# Supplementary material
Source: Springer Nature journal article supplement (https://www.springermedizin.de/resource/supplementary/12943_2013_1524_MOESM4_ESM.pdf/9552454)

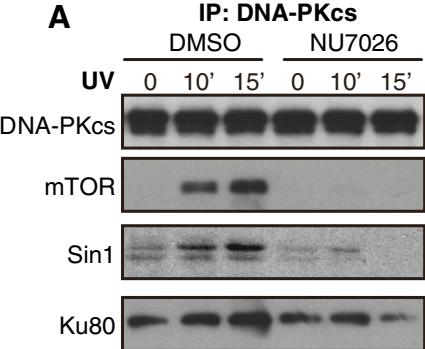

DNA-PKcs bound Sin1

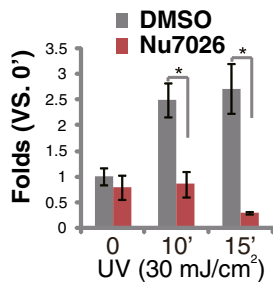

IP: SIN1

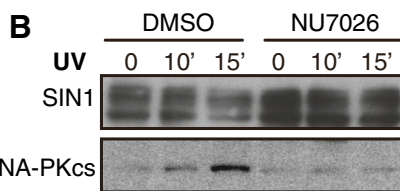

Sin1 bound DNA-PKcs

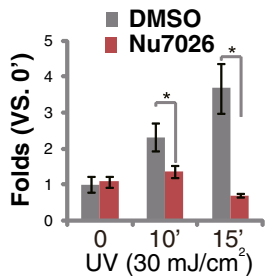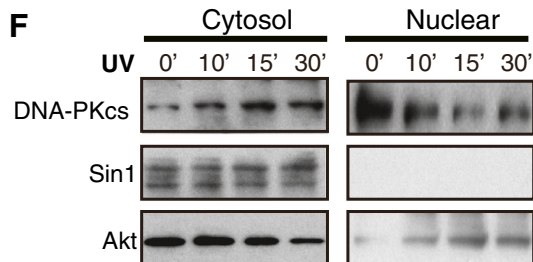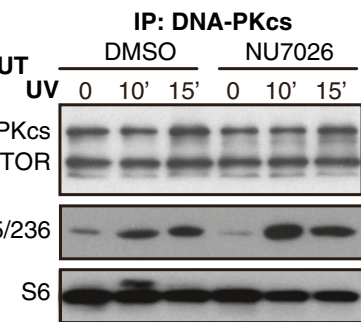

**D**

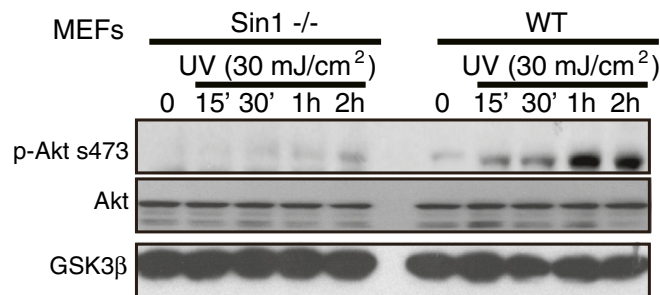

**E** IP: SIN1

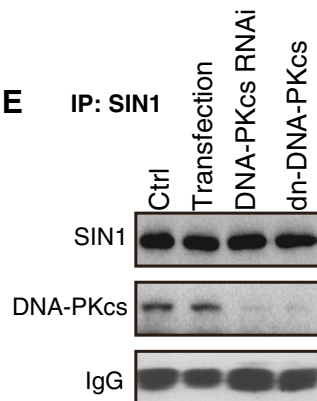

Sin1 bound DNA-PKcs

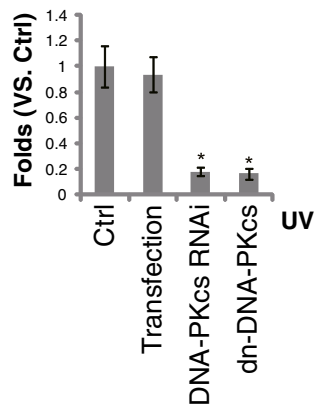

Cytosol DNA-PKcs

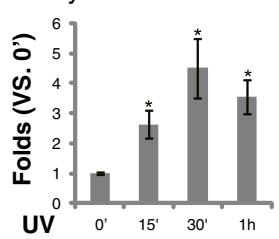

Nuclear DNA-PKcs

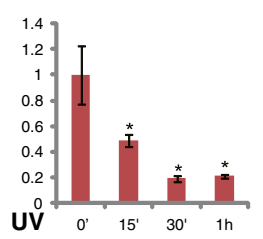

Supplement: MOESM4 [file 9552454]
